# Supplementary material for: SUMOylation of HP1α supports association with ncRNA to define responsiveness of breast cancer cells to chemotherapy
Source: Oncotarget. 2016 Apr 14;7(21):30336–49. doi: 10.18632/oncotarget.8733 (PMC5058684; doi:10.18632/oncotarget.8733)
Supplement: Supplementary file 1 [file oncotarget-07-30336-s001.pdf]

**SUMOylation of HP1α supports association with ncRNA to define responsiveness of breast cancer cells to chemotherapy**

**Supplementary Material**

**Supplemental Table S1: Summary of Alignment Results**

| Sample ID     | Total Reads | Mapped Reads | Mapping Rate % |
|---------------|-------------|--------------|----------------|
| Input-wt-HP1α | 17.0M       | 14.7M        | 86%            |
| Input-S-HP1a  | 19.8M       | 17.7M        | 89%            |
| wt-HP1a       | 11.3M       | 10.3M        | 91%            |
| S-HP1a        | 31.3M       | 28.5M        | 91%            |

**Supplemental Table S2:** Number of Peaks Detected Independent of Input

| Sample ID | FDR 0.05 | FDR 0.05 & No. Overlap with Input |
|-----------|----------|-----------------------------------|
| wt-HP1a   | 823      | 632                               |
| S-HP1a    | 1155     | 1012                              |

**Supplemental Table S3:** Primer List for RNase-ChIP.

| Chromatin Loci           | Primers                                                                                                        | Reference                 |
|--------------------------|----------------------------------------------------------------------------------------------------------------|---------------------------|
| <i>DHFR</i> promoter     | Forward: 5'-TTCTGCTGTAACGAGCGGGCTCGGA-3'<br>Reverse: 5'-CTACAAGTTAGAGAAACAGCGTTACTCGAA-3'                      | 5                         |
| <i>TS</i> promoter       | Forward: 5'-TGGCGCACGCTCTCTAGAGC-3'<br>Reverse: 5'-GACGGAGGCAGGCCAAGTG-3'                                      | 5                         |
| <i>c-Myc</i> promoter    | Forward: 5'-GGCTTCTCAGAGGCTTGCGGG-3'<br>Reverse: 5'-TCCAGCGTCTAAGCAGCTGCAA-3'                                  | 30                        |
| <i>Rad51C</i> promoter   | Forward: 5'-CGCTTGCACTGATCACCAGA-3'<br>Reverse: 5'-GTTGCCTGCCTCTGCATTTG-3'                                     | -                         |
| <i>BRIP1</i> promoter    | Forward: 5'-CTGTCATATACCTACTGCCCAG-3'<br>Reverse: 5'-GAGGTGTGATGATGGGATGGCA-3'                                 | -                         |
| <i>PPM1D</i> promoter    | Forward: 5'-CAGTTGGGGTTAAGCCATGTTG-3'<br>Reverse: 5'-GGGGTGGCTCACGTCTATAATC-3'                                 | -                         |
| <i>Vimentin</i> promoter | Forward: 5'-CCGCAGCCCCGAGACCGCCGCGCA-3'<br>Reverse: 5'-GTCCCGTTACTTCAGCGCTGGGCT-3'                             | 5                         |
| <i>c-fos</i> promoter    | Forward: 5'-TGTTGGCGGCAGCCCGCGAGCAGTTC-3'<br>Reverse: 5'-GGCGCGTGTCTAATCTCGTGAGCAT-3'                          | 5                         |
| Telomere                 | Forward: 5'-GGTTTTTGAGGGTGAGGGTGAGGGTGAGGGTGAGGGT-3'<br>Reverse: 5'-TCCCGACTATCCCTATCCCTATCCCTATCCCTATCCCTA-3' | 29                        |
| $\alpha$ -satellite      | SimpleChIP® Human $\alpha$ Satellite Repeat Primers #4486                                                      | Cell Signaling Technology |

**Supplemental Table S4:** Primer List for Chromatin RIP.

| RNA                 | Primers                                                                          | Reference |
|---------------------|----------------------------------------------------------------------------------|-----------|
| DHFR ncRNA          | Forward: 5'-TTGCCCTGCCATGTCTCG-3'<br>Reverse: 5'-ACCTGGTCGGCTGCACCT-3'           | 24        |
| Rad51C ncRNA        | Forward: 5'-TGTTGGAAAAACACAATTATGGTAA-3'<br>Reverse: 5'-TCTTATTTGGTTTCCTGACGA-3' | -         |
| HOTAIR              | Forward: 5'- CAGTGGAATGGAACGGATTT -3'<br>Reverse: 5'- TCAGACTCTTTGGGGCCTTA -3'   | 31        |
| Xist                | Forward: 5'-CTTGAAGACCTGGGGAAATCCC-3'<br>Reverse: 5'-TGTCAATCTAAAGGTAACCGGC-3'   | 32        |
| TUG                 | Forward: 5'-AGTGAATTATGTCCTGTGCCT-3'<br>Reverse: 5'-GATGGGTGAATGCCTCCTG-3'       | 33        |
| chromosome 2p TERRA | Forward: 5'-TAAGCCGAAGCCTAACTCGTGTC-3'<br>Reverse: 5'-GTAAAGGCGAAGCAGCATTCTCC-3' | 34        |

**Supplemental Table S5:** Primer List for Real-time PCR.

| RNA         | Primers                                                                        | Reference |
|-------------|--------------------------------------------------------------------------------|-----------|
| DHFR mRNA   | Forward: 5'-TAAACTGCATCGTCGCTGTGT-3'<br>Reverse: 5'-AGGTTGTGGTCATTCTCTGGAAA-3' | 5         |
| Rad51C mRNA | Forward: 5'-CTGCATTAGGGGAAAGTTGG-3'<br>Reverse: 5'-GGGTGCTCAAGGAACCTTCT-3'     | -         |
| PPM1E mRNA  | Forward: 5'-TCAATCCATGCCATCAAAAA-3'<br>Reverse: 5'-GAACATCTCCTGGCGGACTA-3'     | -         |
| PPM1D mRNA  | Forward: 5'-AGCACTTGTGGGGTTTCATC-3'<br>Reverse: 5'-TACATCTTCATGCCCCGAAT-3'     | -         |
| BRIP1 mRNA  | Forward: 5'-CCCCGTTTCAAAACAGAGAA-3'<br>Reverse: 5'-CCAGGGCTTCTTCAGAACAG-3'     | -         |

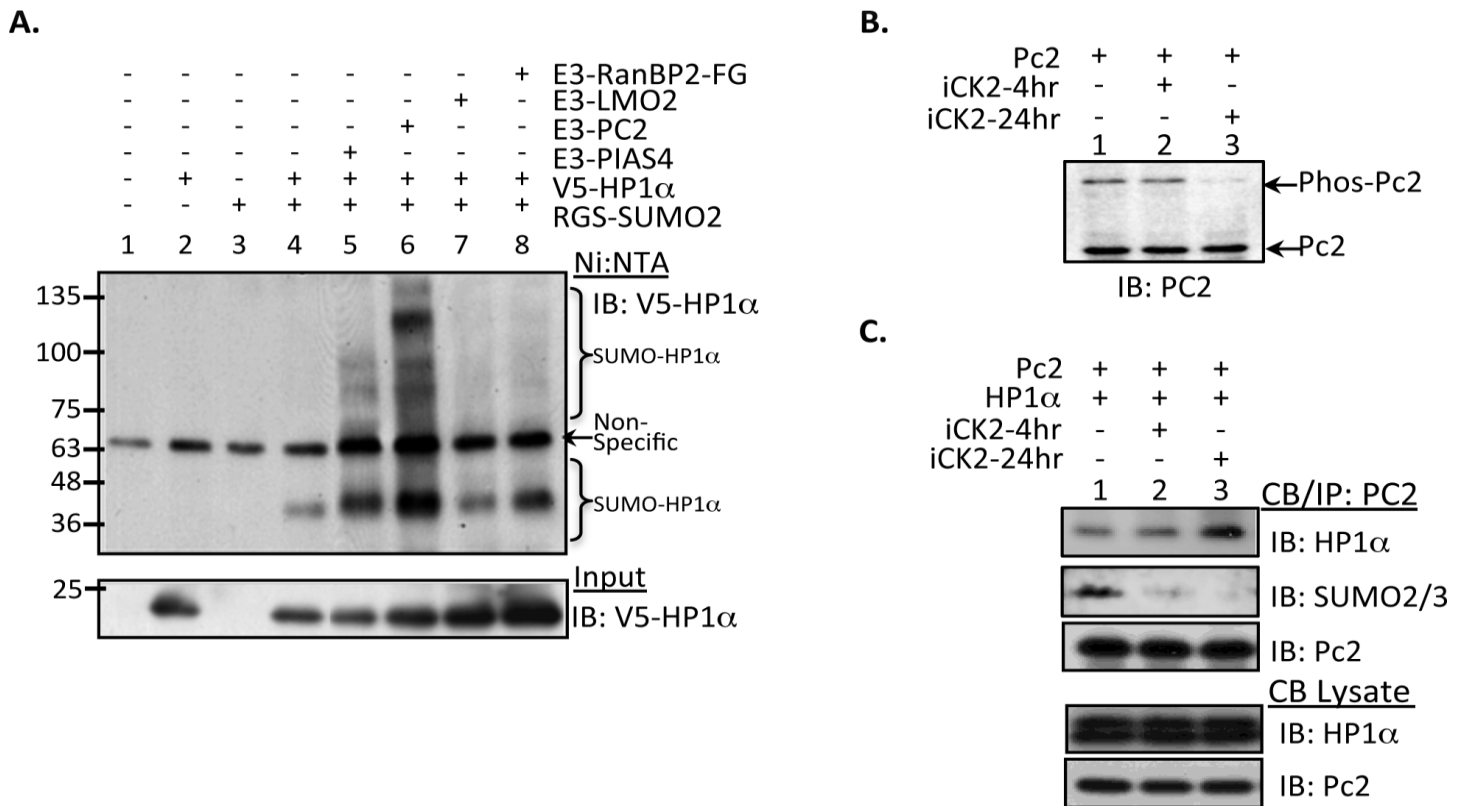

**Supplemental Figure S1: PC2's SUMO E3 ligase activity and HP1 $\alpha$  knockdown efficiency.** (A) PC2 exhibits SUMO E3 ligase activity for HP1 $\alpha$ . HEK293 cells were transfected with equivalent amounts of the indicated plasmids in the presence of select SUMO E3 ligases. SUMOylated proteins were purified with a nickel-agarose resin and subject SDS-PAGE. Immunoblots for the V5-tag of HP1 $\alpha$  is presented from Ni:NTA and Input samples. (B-C) MCF7 cells were treated with the CK2 inhibitor for the indicated time points prior to harvesting. (B) Samples were subject to Phos-tag SDS-PAGE to identify phosphorylated PC2, which is reduced with 24hr CK2 inhibitor treatment. (C) PC2 was immunoprecipitated from chromatin fractions and subsequently assessed for SUMO-PTM and HP1 $\alpha$ -interaction. Treatment with CK2 inhibitor reduces PC2 auto-SUMOylation (correlating with reduced SUMO-E3 activity) but increases PC2-HP1 $\alpha$  interaction at the chromatin.

**A.**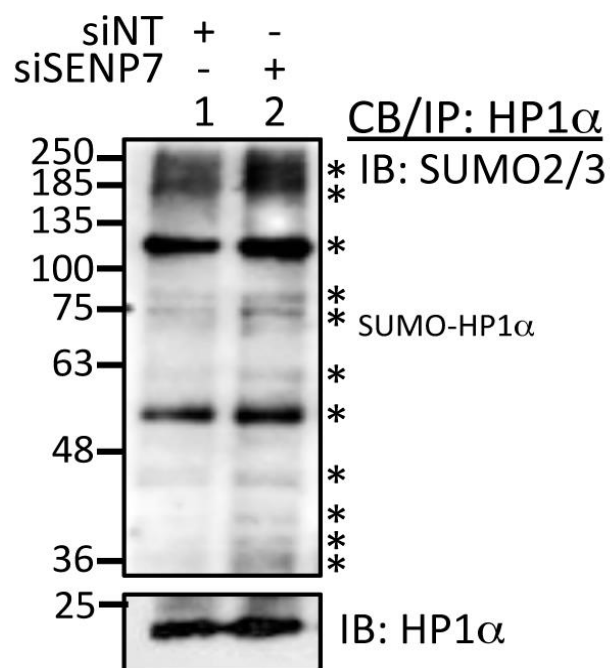**B.**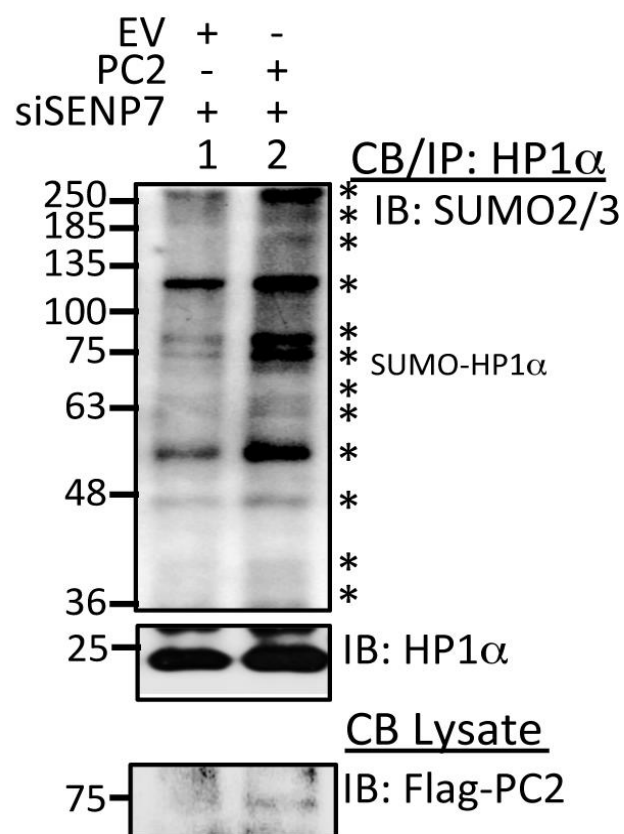

**Supplemental Figure S2:** Endogenous HP1 $\alpha$  is hyperSUMOylated with knockdown of SENP7 and induction of PC2. **(A)** MCF7 cells were treated with non-targeting or SENP7-targeting siRNA for 24hr and endogenous HP1 $\alpha$  was immunoprecipitated from chromatin fractions. SUMO-PTM HP1 $\alpha$  that increases with siSENP7 treatment is highlighted with asterisks. **(B)** siSENP7-treated MCF7 cells were concurrently transfected with empty vector (EV) or Flag-tagged PC2. Endogenous chromatin-bound HP1 $\alpha$  was isolated and evaluated for SUMO-PTM. The increase SUMOylated HP1 $\alpha$  observed with PC2 induction is marked with asterisks.

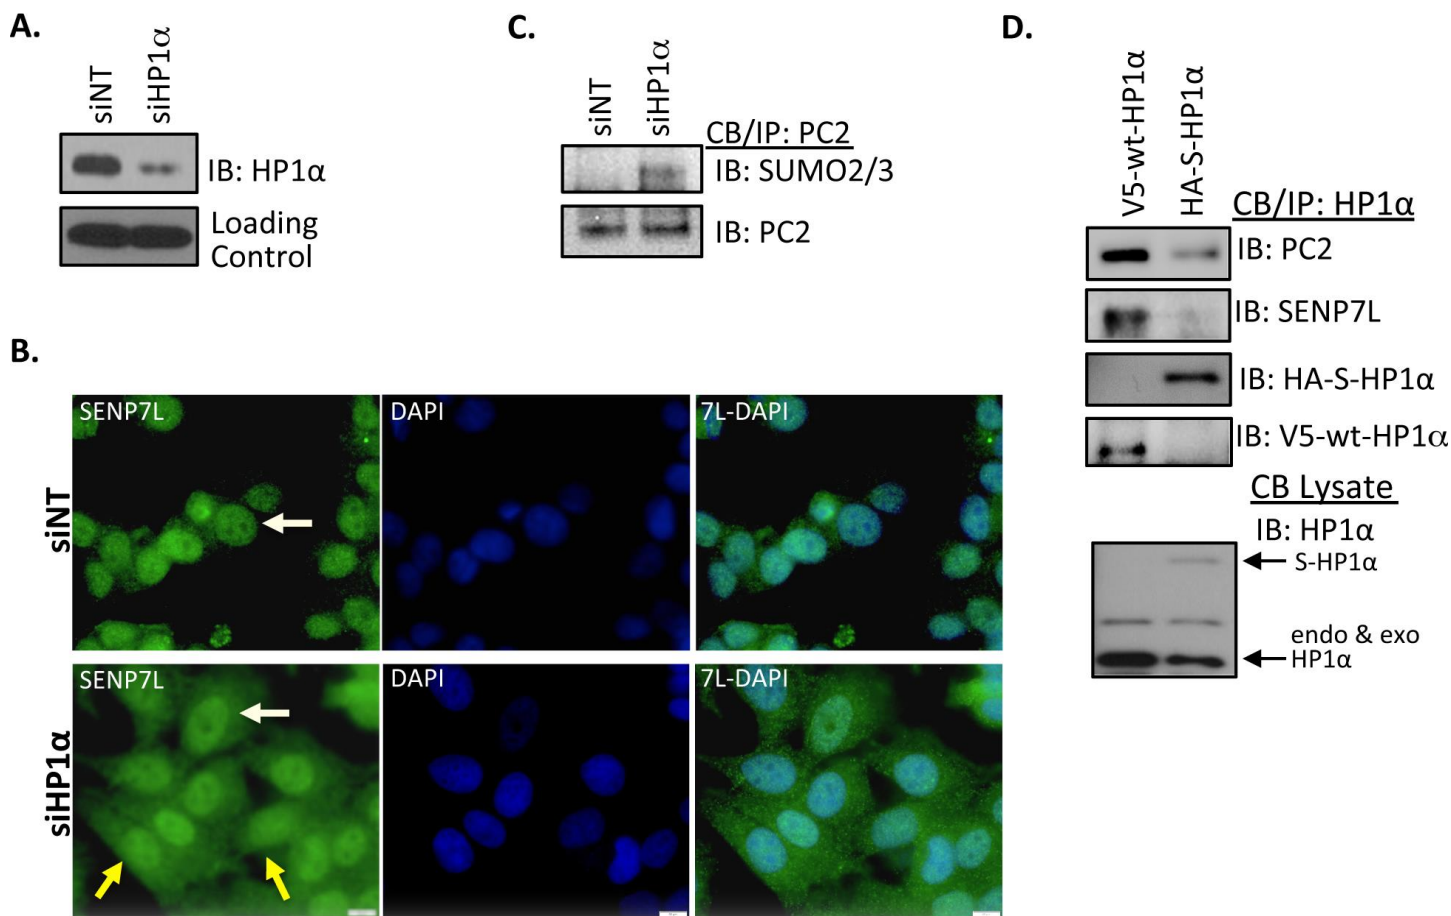

**Supplemental Figure S3:** MCF7 cells were treated with either non-targeting (siINT) or HP1α-targeting siRNA (siHP1α). Cells were utilized after 48h in normal growth conditions. **(A)** HP1α protein loss with targeted siRNA treatment. **(B)** SENP7L redistribution with siHP1α. Multiple 20x magnification images were assessed for SENP7L localization; specifically, percent of cells with 1) greater nuclear to cytosolic (white arrows), 2) equal nuclear and cytosolic (yellow arrows), and 3) greater cytosolic to nuclear SENP7L was evaluated. **(C)** HP1α loss increases PC2 SUMOylation. Chromatin-bound PC2 was immunoprecipitated and evaluated for SUMO2/3 modification via western blot with the indicated antibodies. **(D)** Neither PC2 nor SENP7L efficiently bind S-HP1α. Immunoprecipitated wt- and S-HP1α were evaluated for interaction with PC2 and SENP7L using Western blot analysis. All blots are representative of 2-3 independent experiments.

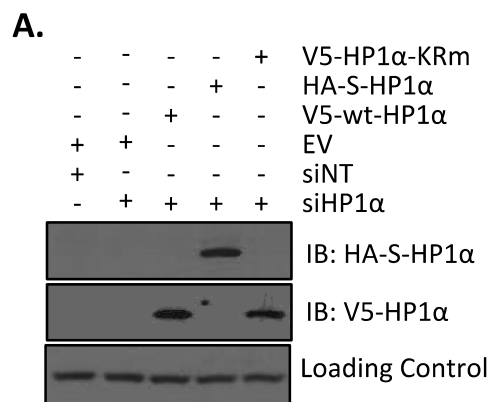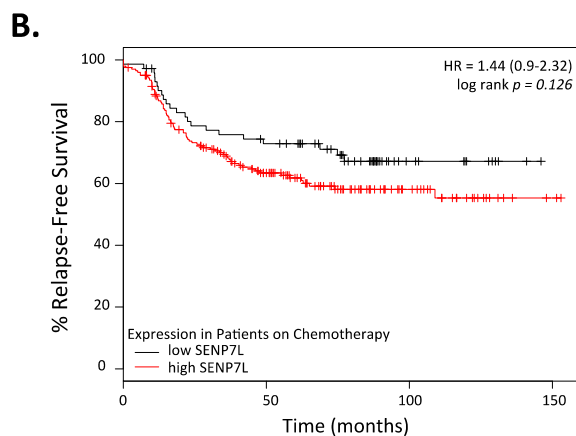

**Supplemental Figure S4: HP1 $\alpha$  SUMOylation and consistently SENP7L loss increases probability of recurrence-free disease.** (A) MCF7 cells were treated with the indicated siRNA (siNT, siHP1 $\alpha$ , or siSENP7) and concurrently transfected with either empty vector (EV) or the indicated plasmid construct. After 48hr, cells were evaluated for plasmid expression via SDS-PAGE. (B) BCa patients on chemotherapy with low SENP7L exhibit a lower risk of disease recurrence or relapse. Kaplan-Meier plot of chemotherapy-treated BCa patients separated into low and high SENP7L gene expression levels indicates a statistical trend towards significance with a p-value of  $p=0.126$ .
